# Supplementary material for: Fever After Influenza, Diphtheria-Tetanus-Acellular Pertussis, and Pneumococcal Vaccinations
Source: Oxford University Press journal article supplement (doi:10.1542/peds.2019-1909), 2020-02-06
Supplement: peds_20191909supplementarydata.pdf [file peds_20191909supplementarydata.pdf]

# Supplemental Information

## STUDY INCLUSION AND EXCLUSION CRITERIA

### Subject Inclusion Criteria (Visit 1)

Subjects who meet all of the following criteria will be eligible to participate in this interventional study:

1. 12 to 16 months of age (ie, from the 1-year birthday until the day before 17 months of age) at the time of vaccination;
2. stable health, as determined by the investigator's clinical examination and assessment of the child's medical history;
3. has received all immunizations recommended by the ACIP during the first year of life, with the exception of rotavirus and influenza vaccines<sup>1\*</sup>;
4. the parent(s) or legally authorized representative(s) (LAR[s]) intends for the child to receive DTaP vaccine and PCV13 in addition to this season's IIV;
5. the parent(s) or LAR(s) is willing and capable of providing permission for their child to participate through the written informed consent process;
6. the parent(s) or LAR(s) is able to comply with the requirements of the protocol (eg, completion of the memory aid [either electronic or paper diary], return for follow-up visits, respects intervals between the visits, and has telephone access);
7. the parent(s) or LAR(s) is English speaking; and

8. the parent(s) or LAR(s) agrees to sign a medical release for the child so that study personnel may obtain medical information about the child's health (if needed).

### Subject Exclusion Criteria (Visit 1)

Subjects who meet any of the following criteria will not be eligible to participate in this study:

1. history of any seizure (including FS) in the child or a FS in a first-degree relative (first-degree relatives include biological parents or siblings);
2. has already completed influenza vaccination during the current season per ACIP recommendations<sup>2†</sup>;
3. receipt of >3 previous doses of DTaP vaccine;
4. received the third dose of DTaP vaccine within 6 months of visit 1;
5. receipt of >3 previous doses of PCV13;
6. received the third dose of PCV13 within 8 weeks of visit 1;
7. history of a severe allergic reaction (eg, anaphylaxis) to a previous dose of any influenza vaccine; diphtheria toxoid-containing, tetanus toxoid-containing, or pertussis-containing vaccine; or pneumococcal vaccine;
8. history of a severe allergic reaction (eg, anaphylaxis) to any component (including egg protein) of any of the 3 vaccines used in this study or history of a latex allergy;
9. history of Guillain-Barré syndrome within 6 weeks after a previous dose of influenza, DTaP, or tetanus toxoid-containing vaccine;
10. history of a progressive neurologic disorder;
11. history of encephalopathy within 7 days of a previous dose of pertussis-containing vaccine;
12. history of collapse within 3 days after a previous dose of DTaP vaccine;
13. received any other licensed vaccines within 14 days (for inactivated vaccines) or 28 days (for live vaccines) before visit 1<sup>3‡</sup>;
14. received an experimental or investigational agent (vaccine, drug, biologic, device, blood product, or medication) within 28 days before visit 1 or expects to receive an experimental or investigational agent during the study period (up to 8 days after visit 2);
14. a moderate to severe acute illness within 72 hours of visit 1 (all vaccines can be administered to persons with a minor illness such as diarrhea or mild upper respiratory infection without fever);
15. a reported temperature  $\geq 100.4^{\circ}\text{F}$  ( $38.0^{\circ}\text{C}$ ) within 72 hours before enrollment or a temperature (measured by temporal artery thermometer)  $\geq 100.4^{\circ}\text{F}$  ( $38.0^{\circ}\text{C}$ ) at the time of enrollment (this

- may result in a temporary delay of vaccination);
16. receipt of an antipyretic medication (acetaminophen or ibuprofen) within 24 hours before enrollment (this may result in a temporary delay of vaccination);
  17. parent or /LAR is planning to administer a prophylactic antipyretic or medication on the day of and/or within 7 days after visit 1 or visit 2 (this exclusion does not apply if the caretaker indicates that he or she might administer antipyretics or analgesics after vaccination to reduce fever or pain);
  18. long-term (at least 14 consecutive days) oral corticosteroids (prednisone 2 mg/kg per day or equivalent other glucocorticoid), any parenteral steroids, high-dose inhaled steroids (>800 µg/day of beclomethasone dipropionate or equivalent), or other immune-modifying drugs or immunosuppressants within the preceding 6 months before visit 1 (topical and nasal steroids are allowed);
  19. any confirmed or suspected immunosuppressive or immunodeficient condition based on medical history and/or their provider's routine physical examination (no laboratory testing required);
  20. has an active neoplastic disease, has a history of any hematologic malignancy or current bleeding disorder, or is taking anticoagulants;
  21. unable to receive an intramuscular injection in the thigh (eg, a broken bone or cast for treatment of a broken bone in a lower extremity, a congenital anomaly in a lower extremity precluding administration in the affected extremity, or if deemed

- inappropriate by the study investigator);
22. any condition deemed by the investigator to place the child at increased risk as a result of their participation in the study; and
  23. any child or grandchild of a study investigator or study team member.

#### Modified Exclusion Criteria (Visit 2)

Subjects who meet any of the following exclusion criteria will not be eligible to continue participation in this study:

1. has already completed influenza vaccination during the current season per ACIP recommendations;
2. has a history of a severe allergic reaction (eg, anaphylaxis) to a previous dose of any influenza vaccine;
3. history of a severe allergic reaction (eg, anaphylaxis) to any component (including egg protein) of the influenza vaccine used in this study;
4. history of Guillain-Barré syndrome within 6 weeks after a previous dose of any influenza vaccine;
5. received an experimental or investigational agent (vaccine, drug, biologic, device, blood product, or medication) after random assignment or expects to receive an experimental or investigational agent during the remaining study period (up to 8 days after visit 2);
6. a moderate to severe acute illness within 24 hours of visit 2, which may result in a temporary delay of visit 2 and/or vaccination (all vaccines can be administered to persons with a minor illness such as diarrhea or mild upper respiratory infection without fever);
7. a reported temperature  $\geq 100.4^{\circ}\text{F}$  ( $38.0^{\circ}\text{C}$ ) within 24 hours before

- visit 2 or a temperature (measured by a temporal artery thermometer)  $\geq 100.4^{\circ}\text{F}$  ( $38.0^{\circ}\text{C}$ ) at the time of visit 2 (this may result in a temporary delay of visit 2 and/or vaccination);
8. receipt of an antipyretic medication (acetaminophen or ibuprofen) within 24 hours before visit 2 (this may result in a temporary delay of visit 2 and/or vaccination);
  9. parent(s) or LAR is planning to administer a prophylactic antipyretic or medication on the day of and/or within 7 days after visit 2 (this exclusion does not apply if the caretaker indicates that he or she might administer antipyretics or analgesics after visit 2 to reduce fever or pain);
  10. unable to receive an intramuscular injection in the thigh (eg, a broken bone or cast for treatment of a broken bone in a lower extremity, a congenital anomaly in a lower extremity precluding administration in the affected extremity, or if deemed inappropriate by the study investigator); and
  11. any condition deemed by the investigator to place the child at increased risk as a result of their participation in the study.

**SUPPLEMENTAL TABLE 5** Grading of Solicited Systemic Adverse Events

|                           | Fever Assessment and Solicited Systemic Adverse Events |                                                                              |                                                                      |                                                         |
|---------------------------|--------------------------------------------------------|------------------------------------------------------------------------------|----------------------------------------------------------------------|---------------------------------------------------------|
|                           | None                                                   | Grade 1                                                                      | Grade 2                                                              | Grade 3                                                 |
| Temperature <sup>a</sup>  | ≤37.9°C<br>(≤100.3°F)                                  | ≥38.0°C to ≤38.5°C (≥100.4°F to ≤101.3°F)                                    | ≥38.6°C to ≤39.5°C (≥101.4°F to ≤103.1°F)                            | ≥39.6°C (≥103.2°F)                                      |
| Fussiness or irritability | None                                                   | Less playful than usual but not requiring more attention and able to console | Requiring increased attention but able to console                    | Unable to console                                       |
| Change in eating habits   | None                                                   | Eating less than normal for 1–2 feeds or meals                               | Missed 1 or 2 feeds or meals completely                              | Refuses ≥3 feeds or meals or refuses most feeds or meal |
| Drowsiness or sleepiness  | None                                                   | Drowsy but still interested in surroundings and did not miss a feed or meal  | Not interested in surroundings or did not wake up for a feed or meal | Sleeps most of the time or is difficult to wake up      |

<sup>a</sup> Cutoff values for fever are referenced from the Fluzone Quadrivalent package insert.<sup>11</sup>

**SUPPLEMENTAL TABLE 6** Medical Care Use and Antipyretic Use From Memory Aid

| Question                                              | Yes | No |
|-------------------------------------------------------|-----|----|
| Did you give your child fever or pain medicine?       | Yes | No |
| If yes, was it for fever?                             | Yes | No |
| If yes, was it for pain?                              | Yes | No |
| If yes, check the type or types of medicine given     |     |    |
| Acetaminophen (eg, Tylenol)                           |     |    |
| Ibuprofen (eg, Motrin, Advil)                         |     |    |
| Other                                                 |     |    |
| Did your child receive medical attention?             | Yes | No |
| If yes, was it related to fever?                      | Yes | No |
| If yes, check the type or types of attention received |     |    |
| Telephone call for medical advice                     |     |    |
| Medical office visit, including urgent care visit     |     |    |
| Emergency department visit                            |     |    |
| Hospital admission                                    |     |    |
| If yes, provide the reason for medical attention      |     |    |
| Did your child have a seizure?                        | Yes | No |
| If yes, was it related to fever?                      | Yes | No |

**SUPPLEMENTAL TABLE 7** Occurrence of Any Fever (Temperature  $\geq 38.0^{\circ}\text{C}$ ) and Grade 2 or 3 Fever (Temperature  $\geq 38.6^{\circ}\text{C}$ ) by Follow-up Time Period (Days 1–2 and Days 3–8) after Visit 1 and Visit 2 Combined and Visit 1 and Visit 2 Separately, ITT Population

| Outcome                                                            | Study Group  | Fever Absent, <i>n</i> (%) | Fever Present, <i>n</i> (%) | <i>P</i> | RR (95% CI) <sup>a</sup> |
|--------------------------------------------------------------------|--------------|----------------------------|-----------------------------|----------|--------------------------|
| <b>Days 1–2</b>                                                    |              |                            |                             |          |                          |
| Any fever after visit 1 and visit 2 combined                       | Simultaneous | 101 (91.8)                 | 9 (8.2)                     | .845     | 0.92 (0.39–2.16)         |
|                                                                    | Sequential   | 101 (91)                   | 10 (9)                      |          |                          |
| Grade 2 or 3 <sup>b</sup> fever after visit 1 and visit 2 combined | Simultaneous | 106 (96.4)                 | 4 (3.6)                     | .539     | 0.68 (0.20–2.33)         |
|                                                                    | Sequential   | 105 (94.6)                 | 6 (5.4)                     |          |                          |
| Any fever after visit 1                                            | Simultaneous | 101 (91.8)                 | 9 (8.2)                     | .966     | 1.02 (0.42–2.46)         |
|                                                                    | Sequential   | 102 (91.9)                 | 9 (8.1)                     |          |                          |
| Grade 2 or 3 <sup>b</sup> fever after visit 1                      | Simultaneous | 106 (96.4)                 | 4 (3.6)                     | .756     | 0.82 (0.23–2.94)         |
|                                                                    | Sequential   | 106 (95.5)                 | 5 (4.5)                     |          |                          |
| Any fever after visit 2                                            | Simultaneous | 105 (100)                  | 0 (0)                       | .326     | —                        |
|                                                                    | Sequential   | 110 (99.1)                 | 1 (0.9)                     |          |                          |
| Grade 2 or 3 <sup>b</sup> fever after visit 2                      | Simultaneous | 110 (100)                  | 0 (0)                       | .326     | —                        |
|                                                                    | Sequential   | 110 (99.1)                 | 1 (0.9)                     |          |                          |
| <b>Days 3–8</b>                                                    |              |                            |                             |          |                          |
| Any fever after visit 1 and visit 2 combined                       | Simultaneous | 99 (90)                    | 11 (10)                     | .976     | 1.01 (0.46–2.23)         |
|                                                                    | Sequential   | 100 (90.1)                 | 11 (9.9)                    |          |                          |
| Grade 2 or 3 fever after visit 1 and visit 2 combined              | Simultaneous | 107 (97.3)                 | 3 (2.7)                     | .314     | 0.50 (0.13–1.96)         |
|                                                                    | Sequential   | 105 (94.6)                 | 6 (5.4)                     |          |                          |
| Any fever after visit 1                                            | Simultaneous | 104 (94.5)                 | 6 (5.5)                     | .590     | 0.75 (0.27–2.10)         |
|                                                                    | Sequential   | (92.8)                     | 8 (7.2)                     |          |                          |
| Grade 2 or 3 <sup>c</sup> fever after visit 1                      | Simultaneous | 107 (97.3)                 | 3 (2.7)                     | .482     | 0.61 (0.15–2.47)         |
|                                                                    | Sequential   | 106 (95.5)                 | 5 (4.5)                     |          |                          |
| Any fever after visit 2                                            | Simultaneous | 99 (94.3)                  | 6 (5.7)                     | .470     | 1.57 (0.46–5.36)         |
|                                                                    | Sequential   | 107 (96.4)                 | 4 (3.6)                     |          |                          |
| Grade 2 or 3 <sup>d</sup> fever after visit 2                      | Simultaneous | 110 (100)                  | 0 (0)                       | .313     | —                        |
|                                                                    | Sequential   | 110 (99.1)                 | 1 (0.9)                     |          |                          |

—, not applicable.

<sup>a</sup> The sequential group is the reference group, and adjustment was made for study sites.

<sup>b</sup> No grade 3 fever (temperature  $\geq 39.6^{\circ}\text{C}$ ) was reported on days 1 to 2 after visit 1 or 2. Grade 2 fever was a temperature  $\geq 38.6^{\circ}\text{C}$  to  $\leq 39.5^{\circ}\text{C}$ .

<sup>c</sup> One child in the simultaneous group and 2 children in the sequential group had grade 3 fever during days 3 to 8 after visit 1. Of these, only 1 (sequential group) received measles, mumps, rubella, and varicella vaccines.

<sup>d</sup> No grade 3 fever was reported on days 3 to 8 after visit 2.

**SUPPLEMENTAL TABLE 8** Antipyretic Use for Parent-Reported Fever and for Any Indication on Day 1 or 2 After Visit 1 and Visit 2 and Visit 1 and Visit 2 Combined, ITT Population

| Reason for Antipyretic Use                               | Study Group  | No Antipyretic Use, <i>n</i> (%) | Antipyretic Use, <i>n</i> (%) | <i>P</i> | RR (95% CI) <sup>a</sup> |
|----------------------------------------------------------|--------------|----------------------------------|-------------------------------|----------|--------------------------|
| Parent-reported fever after visit 1 and visit 2 combined | Simultaneous | 91 (82.7)                        | 19 (17.3)                     | .114     | 1.74 (0.87–3.51)         |
|                                                          | Sequential   | 110 (90.1)                       | 11 (9.9)                      |          |                          |
| Any indication after visit 1 and visit 2 combined        | Simultaneous | 63 (57.3)                        | 47 (42.7)                     | .004     | 1.75 (1.18–2.58)         |
|                                                          | Sequential   | 84 (75.7)                        | 27 (24.3)                     |          |                          |
| Parent-reported fever after visit 1                      | Simultaneous | 92 (83.6)                        | 18 (16.4)                     | .103     | 1.82 (0.87–3.77)         |
|                                                          | Sequential   | 101 (91)                         | 10 (9)                        |          |                          |
| Any indication after visit 1                             | Simultaneous | 66 (60)                          | 44 (40)                       | .005     | 1.77 (1.17–2.66)         |
|                                                          | Sequential   | 86 (77.5)                        | 25 (22.5)                     |          |                          |
| Parent-reported fever after visit 2                      | Simultaneous | 104 (99)                         | 1 (1)                         | .969     | 1.06 (0.07–16.5)         |
|                                                          | Sequential   | 110 (99.1)                       | 1 (0.9)                       |          |                          |
| Any indication after visit 2                             | Simultaneous | 100 (95.2)                       | 5 (4.8)                       | .678     | 1.31 (0.36–4.74)         |
|                                                          | Sequential   | 107 (96.4)                       | 4 (3.6)                       |          |                          |

<sup>a</sup> The sequential group is the reference group and adjustment was made for study sites.

## SUPPLEMENTAL REFERENCES

- Centers for Disease Control and Prevention. Table 1. Recommended

child and adolescent immunization schedule for ages 18 years or younger, United States, 2017. Available at:

<https://www.cdc.gov/vaccines/schedules/hcp/imz/child-adolescent.html>. Accessed May 9, 2017
